# Supplementary material for: Planarian CREB-binding protein (CBP) gene family regulates stem cell maintenance and differentiation
Source: bioRxiv or medRxiv preprint supplement (doi:10.1101/2020.09.08.287045), 2020-09-08
Supplement: Supplementary file [file media-1.pdf]

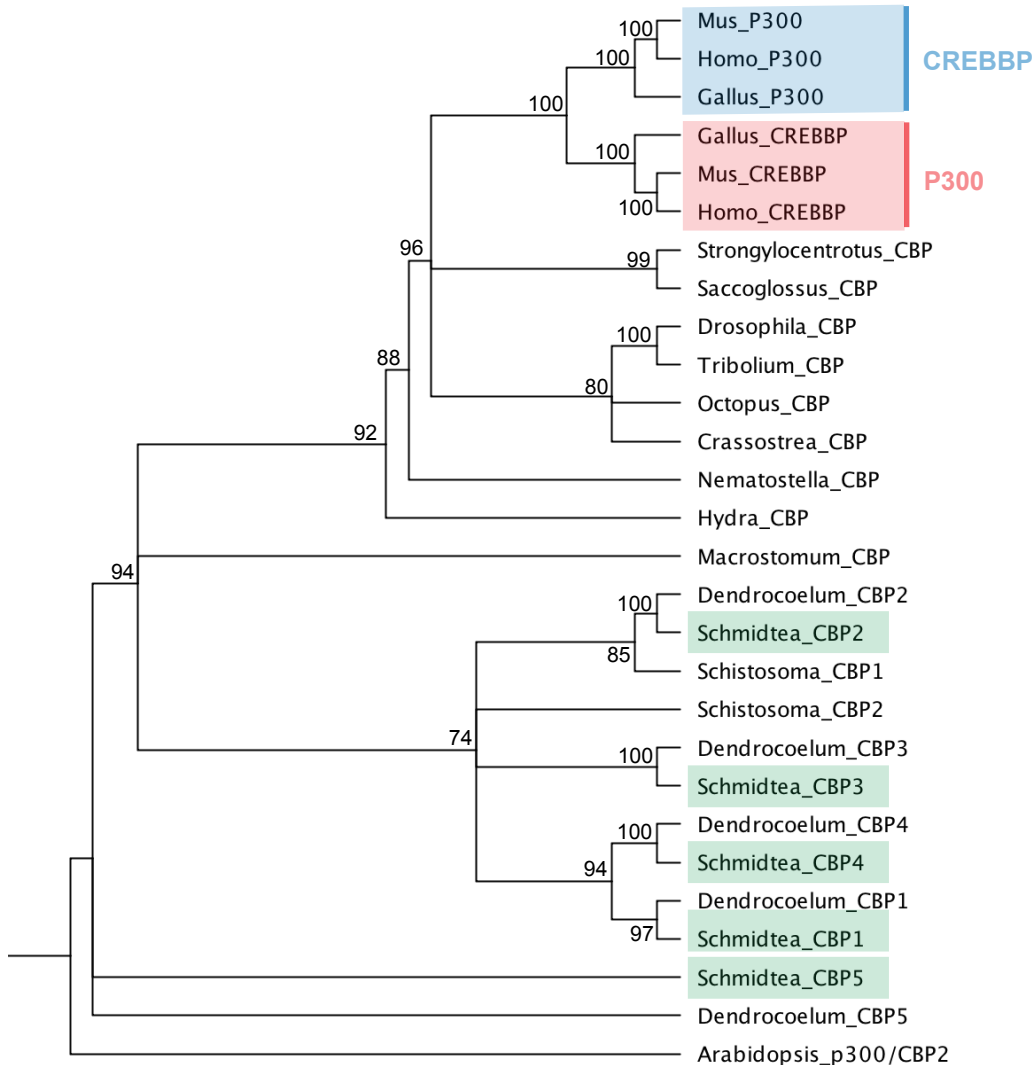

— *Smed-cbp-1*  
 — *Smed-cbp-2*  
 — *Smed-cbp-3*

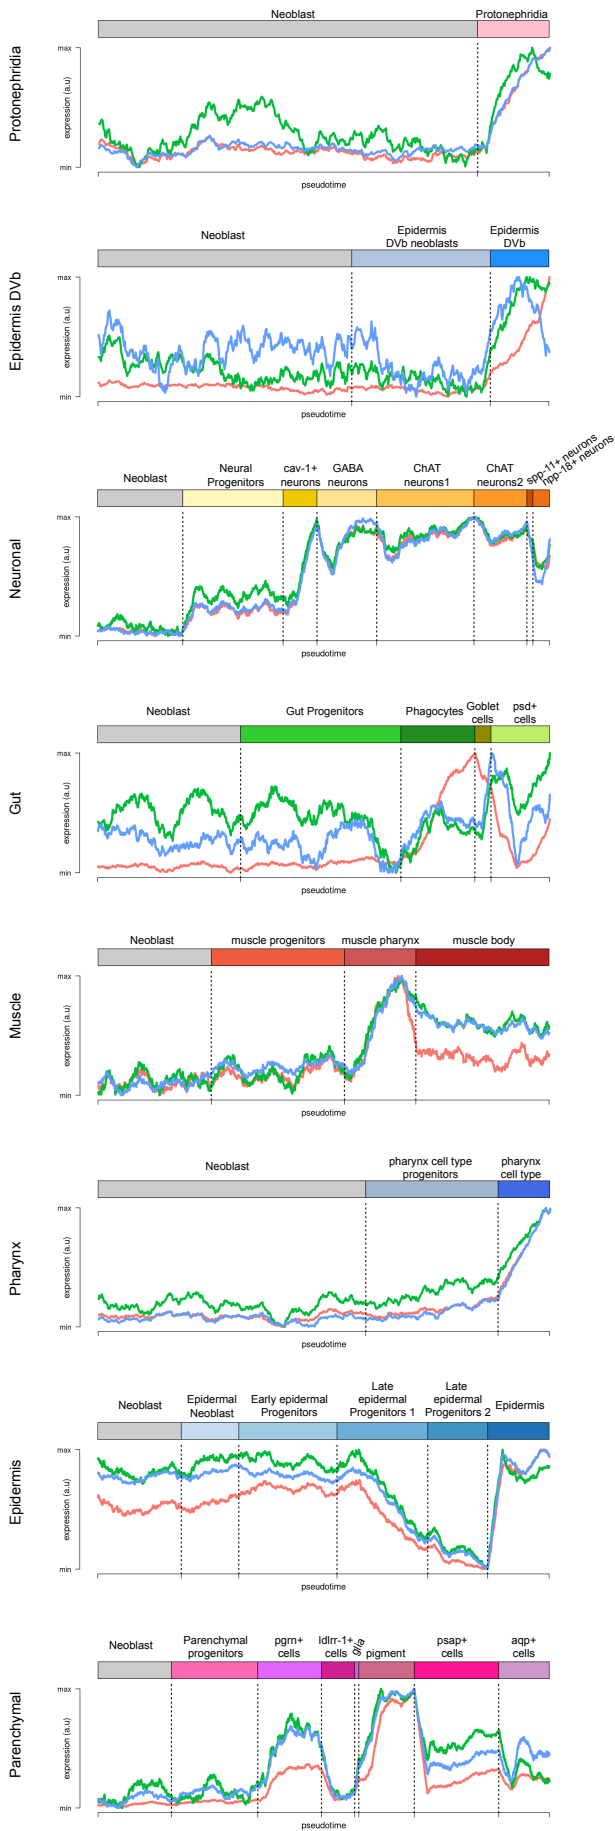

— *Smed-cbp-4*  
 — *Smed-cbp-5*

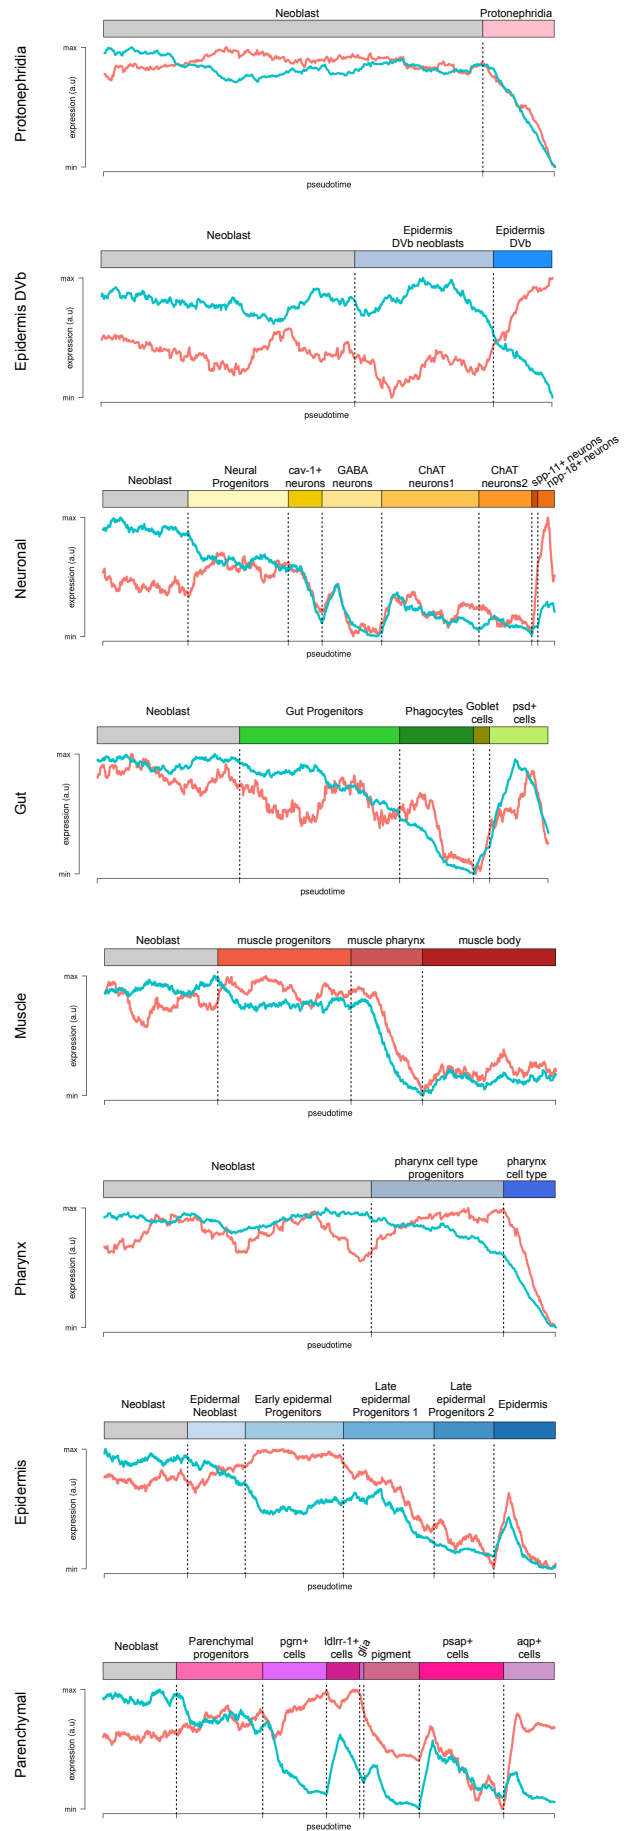

*gfp(RNAi)**Smed-cbp-1(RNAi)**Smed-cbp-4(RNAi)**Smed-cbp-5(RNAi)*

PH3

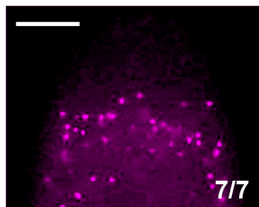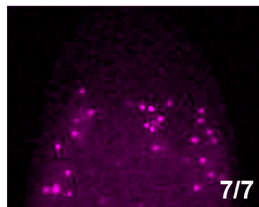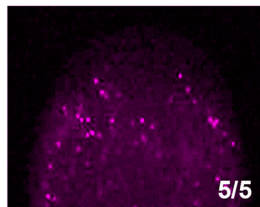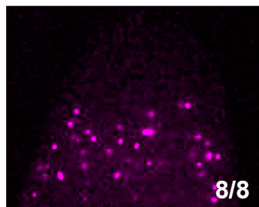*Smedwi-1*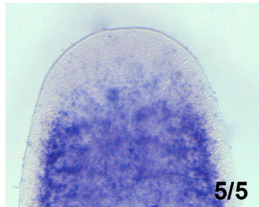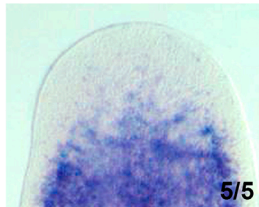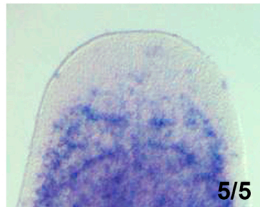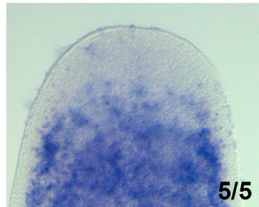

SYNAPSIN

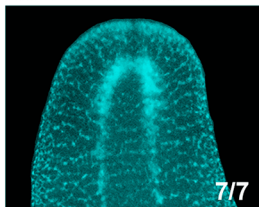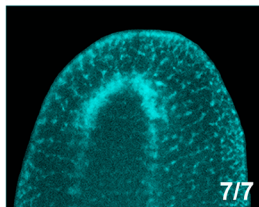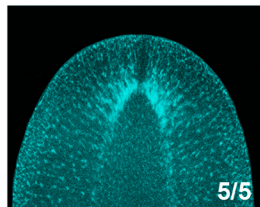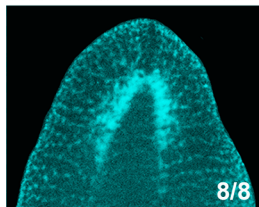*Smed-th*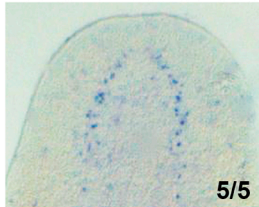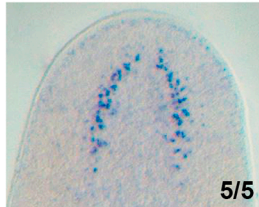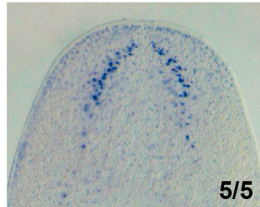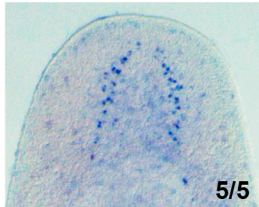

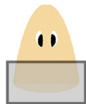

*gfp(RNAi)*

*cbp-2(RNAi)*

***Smed-wntP-1***

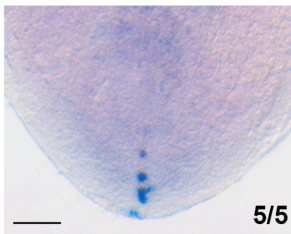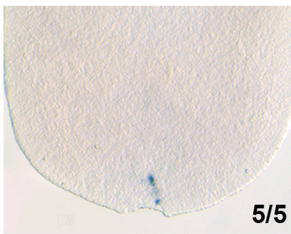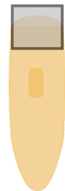

*gfp(RNAi)*

*cbp-2(RNAi)*

***Smed-notum***

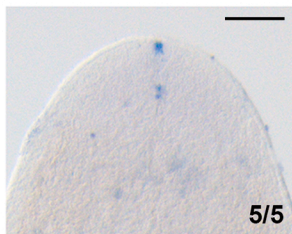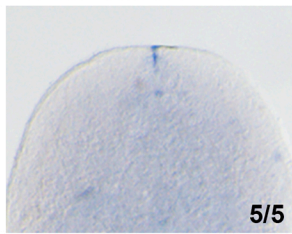

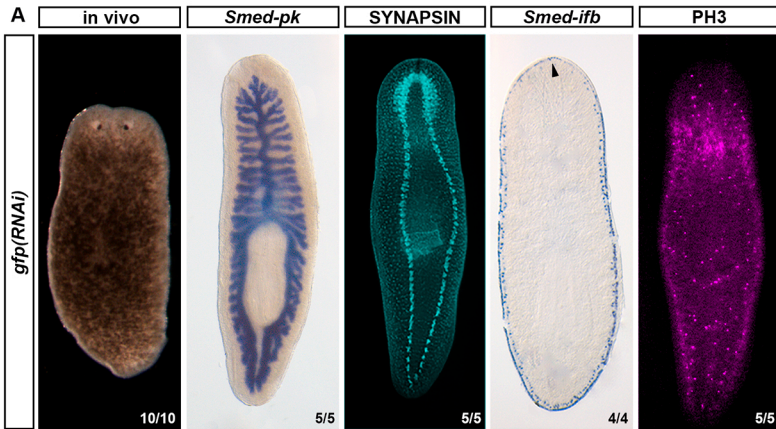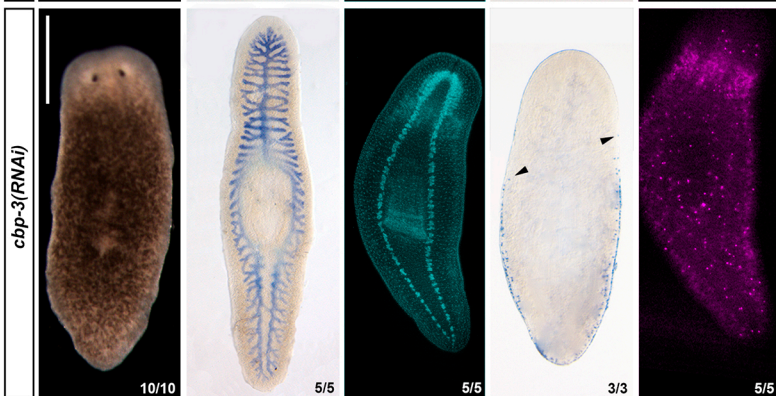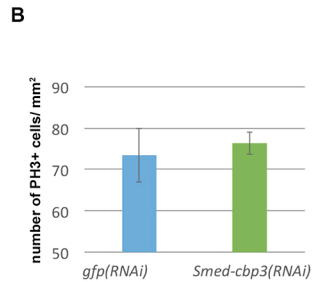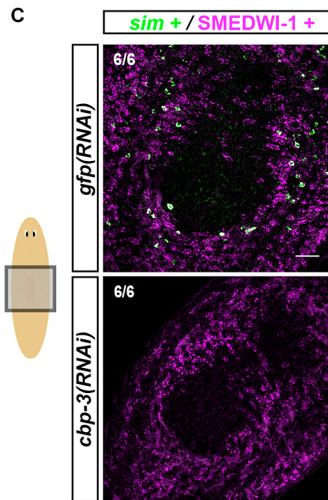

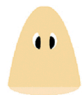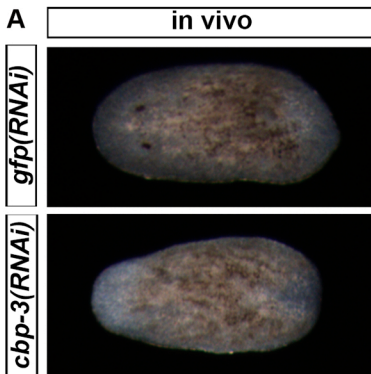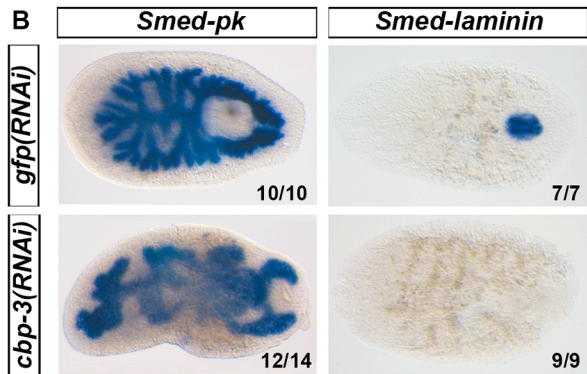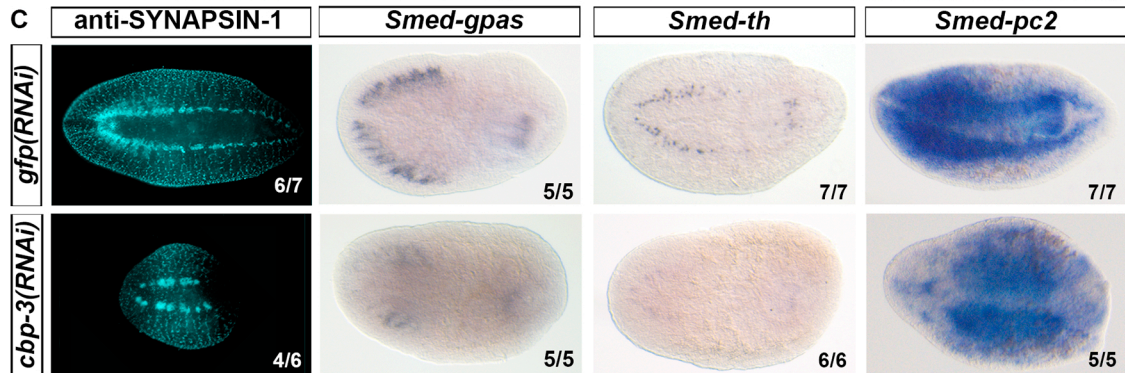

A

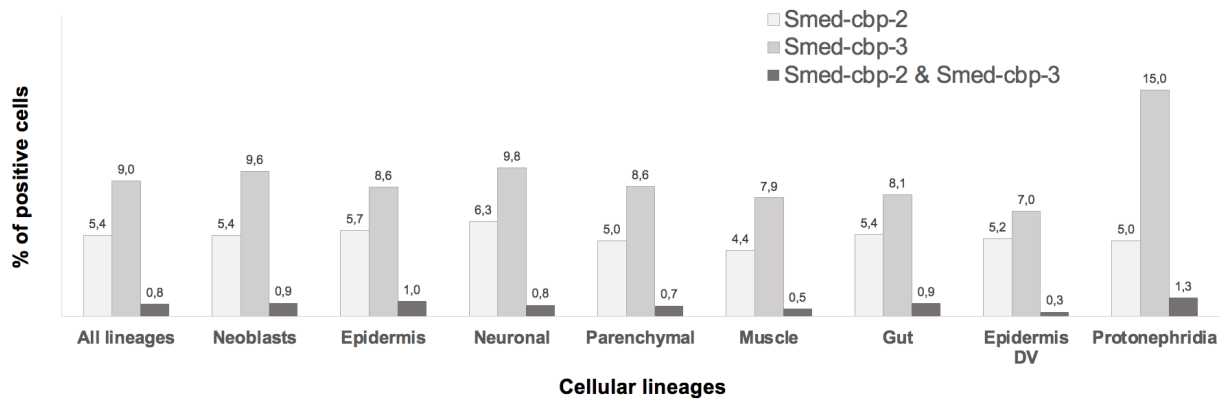

B

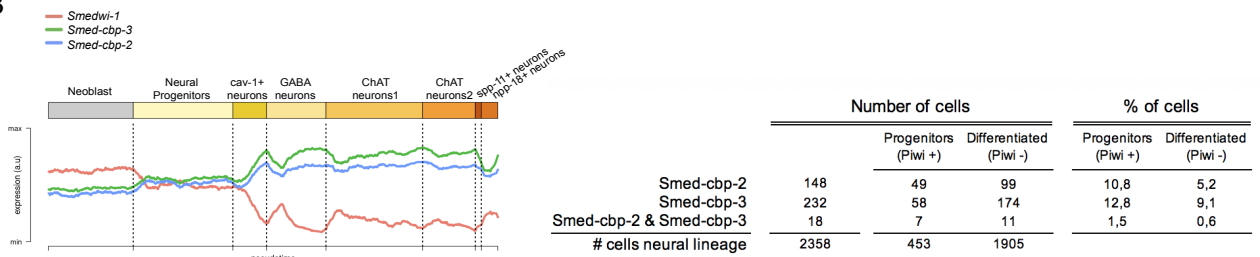

C

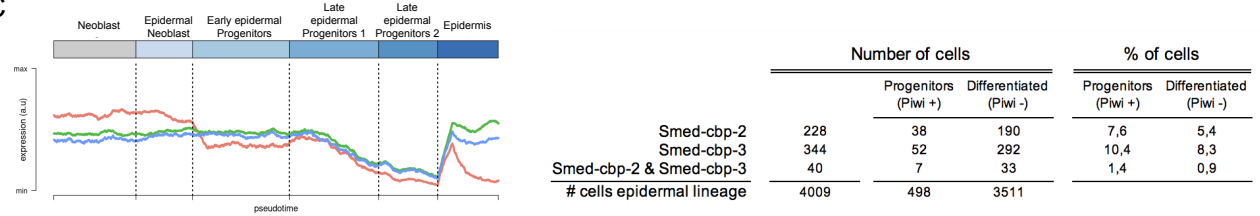

D

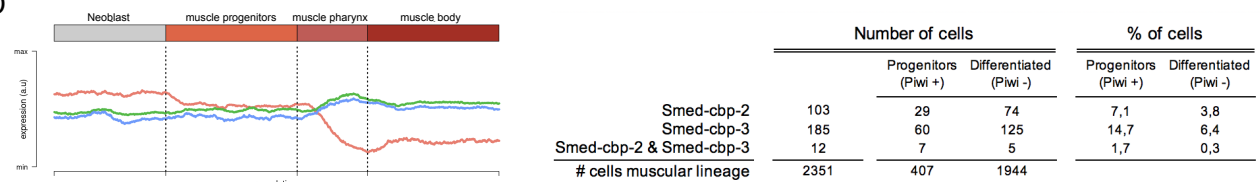

E

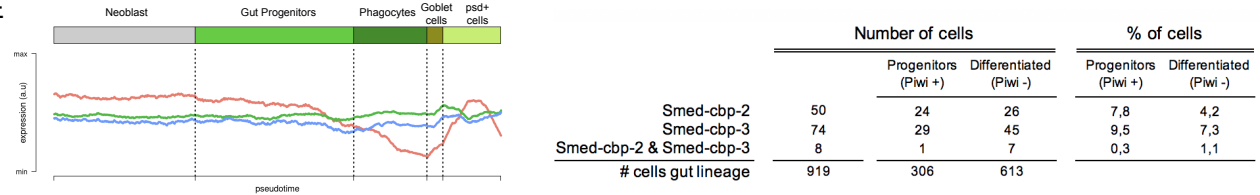

F

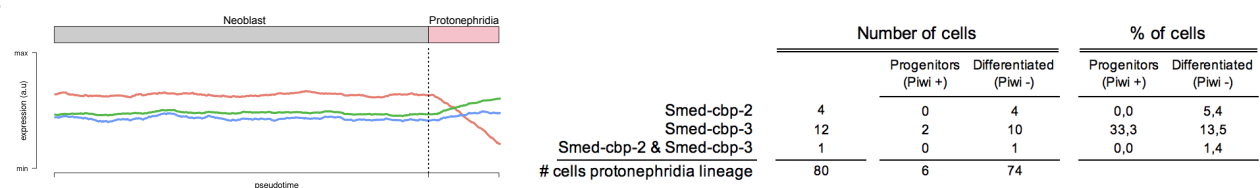

## Smed-CBP-2 Interactome

| Human homologue          | Planarian homologue | Confidence  | Reference                                                                                                        |
|--------------------------|---------------------|-------------|------------------------------------------------------------------------------------------------------------------|
| <b>CDC27</b>             | isotig22501         | 0.643       |                                                                                                                  |
| <b>COPS2</b>             | isotig15449         | 0.71        |                                                                                                                  |
| <b>CPSF4</b>             | isotig01551         | 0.656       |                                                                                                                  |
| <b>CTNNB1 /βcatenin1</b> | isotig23001         | 0.874       | Iglesias et al., 2008<br>Gurley et al., 2008                                                                     |
|                          | isotig22585         | 0.83        | Petersen and Reddien, 2008<br>Chai G et al., 2010<br>Sureda-Gomez et al., 2016<br>Su et al., 2017                |
|                          | <b>EP300</b>        | isotig22472 | 0.609                                                                                                            |
| <b>ETS2</b>              | isotig12474         | 0.831       | He et al., 2017                                                                                                  |
|                          | isotig12473         | 0.798       |                                                                                                                  |
| <b>FHL2</b>              | isotig25875         | 0.796       | Wagner et al., 2012                                                                                              |
|                          | isotig15616         | 0.762       |                                                                                                                  |
|                          | isotig21493         | 0.762       |                                                                                                                  |
|                          | isotig13394         | 0.79        |                                                                                                                  |
| <b>GLI3</b>              | isotig22707         | 0.614       | Rink et al., 2009                                                                                                |
| <b>HIPK2</b>             | isotig21321         | 0.626       |                                                                                                                  |
| <b>HOXB7</b>             | isotig18915         | 0.61        | Bayascas et al., 1997<br>Orii et al., 1999<br>Currie et al., 2016<br>Scimone et al., 2016<br>Tewari et al., 2019 |
|                          | <b>HSF1</b>         | isotig25963 | 0.833                                                                                                            |
|                          | isotig09567         | 0.791       |                                                                                                                  |
| <b>HTT</b>               | isotig14108         | 0.663       |                                                                                                                  |
| <b>KAT2B</b>             | isotig22939         | 0.891       |                                                                                                                  |
| <b>KAT5</b>              | isotig09000         | 0.814       |                                                                                                                  |
| <b>KAT6A</b>             | isotig23440         | 0.775       |                                                                                                                  |
| <b>KLF1</b>              | isotig20465         | 0.85        |                                                                                                                  |
| <b>NCOR1</b>             | isotig23154         | 0.873       |                                                                                                                  |
| <b>NFX1</b>              | isotig13021         | 0.613       | Rodriguez-Esteban et al., 2015                                                                                   |
| <b>NFYA</b>              | isotig24638         | 0.86        | Iyer et al., 2016<br>Rodriguez-Esteban et al., 2015                                                              |
|                          | isotig24612         | 0.816       |                                                                                                                  |
| <b>NFYB</b>              | isotig18238         | 0.878       | Iyer et al., 2016<br>Rodriguez-Esteban et al., 2015                                                              |
|                          | isotig21277         | 0.82        |                                                                                                                  |
| <b>ONECUT1</b>           | isotig25733         | 0.645       |                                                                                                                  |
|                          | isotig22450         | 0.608       |                                                                                                                  |
| <b>PIAS3</b>             | isotig22235         | 0.608       |                                                                                                                  |
|                          | isotig01445         | 0.608       |                                                                                                                  |
| <b>POU2F3</b>            | isotig21518         | 0.774       |                                                                                                                  |
| <b>PPP2R5E</b>           | isotig14006         | 0.623       |                                                                                                                  |
| <b>SETD1A</b>            | isotig19076         | 0.786       | Duncan et al., 2015<br>Hubert et al., 2013                                                                       |
| <b>SMAD3</b>             | isotig13864         | 0.612       | Roberts-Galbraith et al., 2013                                                                                   |
| <b>SMAD4</b>             | isotig25984         | 0.831       | Reddien et al., 2007                                                                                             |
| <b>SMARCA2 / BAF190</b>  | isotig22778         | 0.755       | Trost et al., 2018                                                                                               |
| <b>SMARCB1</b>           | isotig11019         | 0.608       | Rouhana et al., 2017                                                                                             |
| <b>SND1</b>              | isotig13514         | 0.805       |                                                                                                                  |
| <b>TDG</b>               | isotig23364         | 0.604       |                                                                                                                  |
| <b>TGS1</b>              | isotig07164         | 0.782       |                                                                                                                  |
|                          | isotig11458         | 0.755       |                                                                                                                  |
|                          | isotig11459         | 0.738       |                                                                                                                  |
| <b>TP73 / p53</b>        | isotig17795         | 0.643       | Pearson and Sanchez-Alvarado, 2010                                                                               |
| <b>TRIP4</b>             | isotig23604         | 0.886       |                                                                                                                  |
| <b>UBC</b>               | isotig00999         | 0.66        |                                                                                                                  |
| <b>YY1</b>               | isotig14820         | 0.607       |                                                                                                                  |

## Smed-CBP-3 Interactome

| Human homologue          | Planarian homologue  | Confidence | Reference                                                                                                                                         |
|--------------------------|----------------------|------------|---------------------------------------------------------------------------------------------------------------------------------------------------|
| <b>ASF1B</b>             | dd_Smed_v6_5120_0_1  | 0.78       |                                                                                                                                                   |
| <b>BRPF1</b>             | dd_Smed_v6_9528_0_1  | 0.6        |                                                                                                                                                   |
| <b>CDC27</b>             | dd_Smed_v6_7556_0_1  | 0.687      |                                                                                                                                                   |
| <b>COPS2</b>             | dd_Smed_v6_4989_0_1  | 0.716      |                                                                                                                                                   |
| <b>CPSF4</b>             | dd_Smed_v6_4069_0_1  | 0.678      |                                                                                                                                                   |
|                          | dd_Smed_v6_24321_0_1 | 0.657      |                                                                                                                                                   |
| <b>CTBP1</b>             | dd_Smed_v6_43551_0_1 | 0.692      |                                                                                                                                                   |
|                          | dd_Smed_v6_25893_0_1 | 0.692      |                                                                                                                                                   |
| <b>CTNNB1 /βcatenin1</b> | dd_Smed_v6_2688_0_1  | 0.87       | Iglesias et al., 2008<br>Gurley et al., 2008<br>Petersen and Reddien, 2008<br>Chai G et al., 2010<br>Sureda-Gomez et al., 2016<br>Su et al., 2017 |
|                          | dd_Smed_v6_4850_0_1  | 0.847      |                                                                                                                                                   |
|                          | dd_Smed_v6_9667_0_1  | 0.776      |                                                                                                                                                   |
| <b>DYRK1B</b>            | dd_Smed_v6_3773_0_1  | 0.617      |                                                                                                                                                   |
| <b>ETS2</b>              | dd_Smed_v6_6670_0_1  | 0.803      | He et al., 2017                                                                                                                                   |
|                          | dd_Smed_v6_2092_0_1  | 0.851      |                                                                                                                                                   |
| <b>FHL2</b>              | dd_Smed_v6_5037_0_1  | 0.839      | Wagner et al., 2012                                                                                                                               |
|                          | dd_Smed_v6_5014_0_1  | 0.838      |                                                                                                                                                   |
|                          | dd_Smed_v6_5854_0_1  | 0.805      |                                                                                                                                                   |
|                          | dd_Smed_v6_2771_0_1  | 0.805      |                                                                                                                                                   |
| <b>FOXO4</b>             | dd_Smed_v6_3040_0_1  | 0.608      |                                                                                                                                                   |
| <b>HIPK2</b>             | dd_Smed_v6_7724_0_1  | 0.607      |                                                                                                                                                   |
| <b>HOXB7</b>             | dd_Smed_v6_22524_0_1 | 0.677      | Bayascas et al., 1997<br>Orii et al., 1999<br>Currie et al., 2016<br>Scimone et al., 2016<br>Tewari et al., 2019                                  |
|                          | dd_Smed_v6_16227_0_1 | 0.658      |                                                                                                                                                   |
| <b>HSF1</b>              | dd_Smed_v6_7535_0_1  | 0.825      |                                                                                                                                                   |
|                          | dd_Smed_v6_9099_0_2  | 0.776      |                                                                                                                                                   |
| <b>HTT</b>               | dd_Smed_v6_3049_0_1  | 0.668      |                                                                                                                                                   |
| <b>KAT2B</b>             | dd_Smed_v6_11453_0_1 | 0.853      |                                                                                                                                                   |
| <b>KAT5</b>              | dd_Smed_v6_12274_0_1 | 0.786      |                                                                                                                                                   |
|                          | dd_Smed_v6_4706_1_1  | 0.811      |                                                                                                                                                   |
| <b>MSX1</b>              | dd_Smed_v6_18505_0_1 | 0.603      | Mannini et al., 2008                                                                                                                              |
| <b>NCOR1</b>             | dd_Smed_v6_7709_0_1  | 0.792      |                                                                                                                                                   |
| <b>NEUROG1</b>           | dd_Smed_v6_9906_0_1  | 0.646      | Cowles et al., 2013<br>Monjo and Romero, 2015                                                                                                     |
|                          | dd_Smed_v6_26877_0_1 | 0.646      |                                                                                                                                                   |
| <b>NFYA</b>              | dd_Smed_v6_4860_0_1  | 0.867      | Iyer et al., 2016<br>Rodriguez-Esteban et al., 2015                                                                                               |
|                          | dd_Smed_v6_18122_0_1 | 0.839      |                                                                                                                                                   |
| <b>NFYB</b>              | dd_Smed_v6_8585_0_1  | 0.82       |                                                                                                                                                   |
| <b>NFYB</b>              | dd_Smed_v6_5828_0_1  | 0.809      | Iyer et al., 2016<br>Rodriguez-Esteban et al., 2015                                                                                               |
|                          | dd_Smed_v6_16472_0_1 | 0.731      |                                                                                                                                                   |
| <b>ONECUT1</b>           | dd_Smed_v6_25197_0_1 | 0.672      |                                                                                                                                                   |
|                          | dd_Smed_v6_7877_0_1  | 0.672      |                                                                                                                                                   |
| <b>PSMC5</b>             | dd_Smed_v6_1176_0_1  | 0.608      |                                                                                                                                                   |
| <b>RUNX1</b>             | dd_Smed_v6_3565_0_2  | 0.651      | Sandmann et al., 2011<br>Wenemoser et al., 2012<br>Dong et al., 2018                                                                              |
| <b>SETD1A</b>            | dd_Smed_v6_9988_0_1  | 0.753      | Duncan et al., 2015<br>Hubert et al., 2013                                                                                                        |
| <b>SMAD2</b>             | dd_Smed_v6_8193_0_1  | 0.673      | Roberts-Galbraith et al., 2013                                                                                                                    |
| <b>SMAD4</b>             | dd_Smed_v6_1923_0_1  | 0.832      | Reddien et al., 2007                                                                                                                              |
|                          | dd_Smed_v6_19757_0_1 | 0.774      |                                                                                                                                                   |
| <b>SMARCA2 / BAF190</b>  | dd_Smed_v6_16980_0_1 | 0.748      | Trost et al., 2018                                                                                                                                |
| <b>SND1</b>              | dd_Smed_v6_906_0_1   | 0.752      |                                                                                                                                                   |
| <b>SRCAP</b>             | dd_Smed_v6_8618_0_1  | 0.935      |                                                                                                                                                   |
|                          | dd_Smed_v6_12273_0_1 | 0.904      |                                                                                                                                                   |
|                          | dd_Smed_v6_14019_0_1 | 0.886      |                                                                                                                                                   |
| <b>TGS1</b>              | dd_Smed_v6_11559_0_1 | 0.761      |                                                                                                                                                   |
|                          | dd_Smed_v6_9949_0_1  | 0.734      |                                                                                                                                                   |
| <b>TP73 / p53</b>        | dd_Smed_v6_5563_0_1  | 0.698      | Pearson and Sanchez-Alvarado, 2010                                                                                                                |
| <b>TRIP4</b>             | dd_Smed_v6_9211_0_1  | 0.889      |                                                                                                                                                   |
| <b>UBE2D1</b>            | dd_Smed_v6_6773_0_1  | 0.705      |                                                                                                                                                   |
| <b>YY1</b>               | dd_Smed_v6_10092_0_1 | 0.61       |                                                                                                                                                   |
